# Supplementary material for: Mixed-ligand copper(ii)–sulfonamide complexes: effect of the sulfonamide derivative on DNA binding, DNA cleavage, genotoxicity and anticancer activity
Source: Royal Society of Chemistry journal article supplement (doi:10.1039/c3dt50416f), 2013-01-01
Supplement: c3dt50416f.pdf [file c3dt50416f.pdf]

## Supplementary information

### **Mixed-Ligand copper(II)-sulfonamide complexes: Effect of the sulfonamide derivative on DNA binding, DNA cleavage, Genotoxicity and Anticancer activity**

Marta González-Álvarez, Alejandro Pascual-Álvarez, Lucas del Castillo Agudo,  
Alfonso Castiñeiras, Malva Liu-González, Joaquín Borrás, Gloria Alzuet-Piña

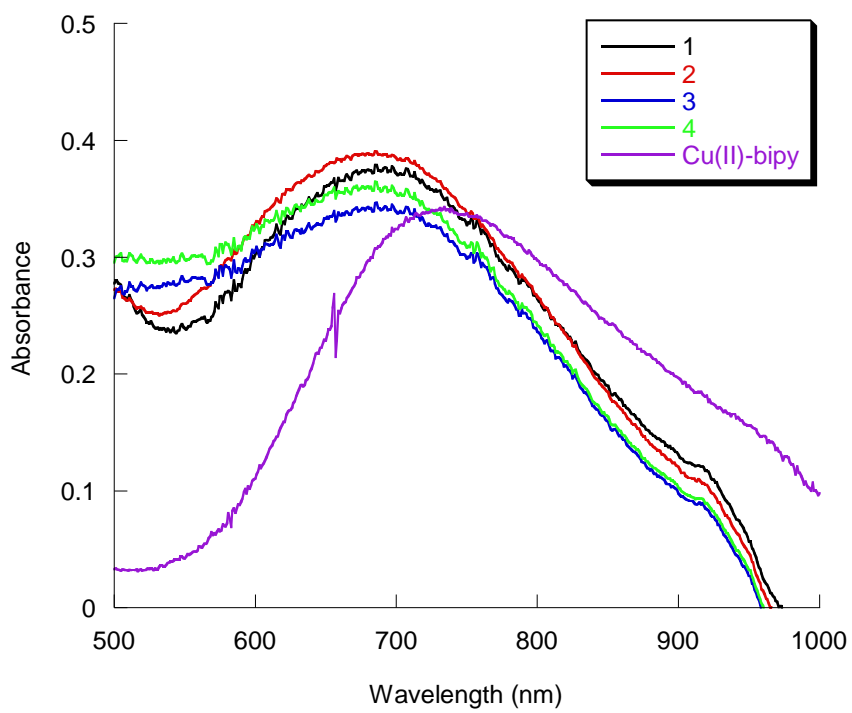

**Fig. S1.** Electronic spectra of compounds **1–4** and Cu(II)-bipy (1:1) in DMF solution.

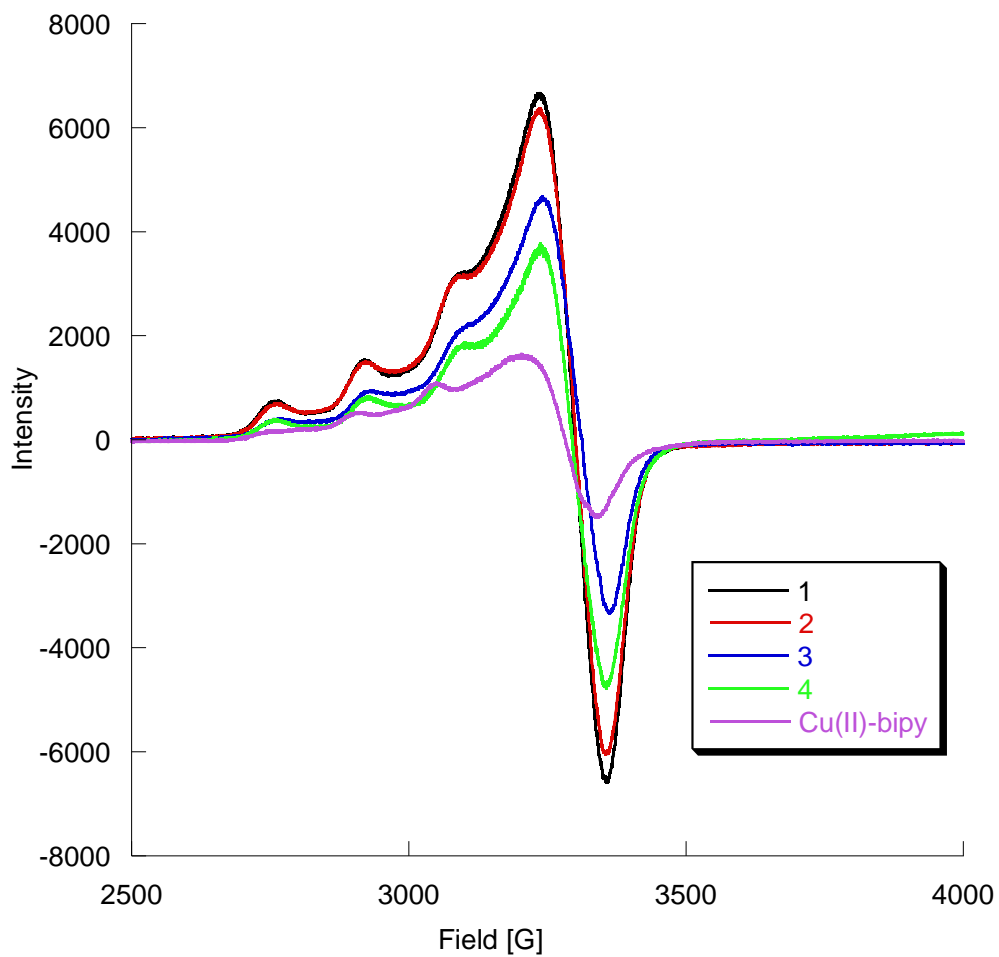

**Figure S2.** X-band EPR spectra of the complexes **1–4** in DMF solution at 40 K.

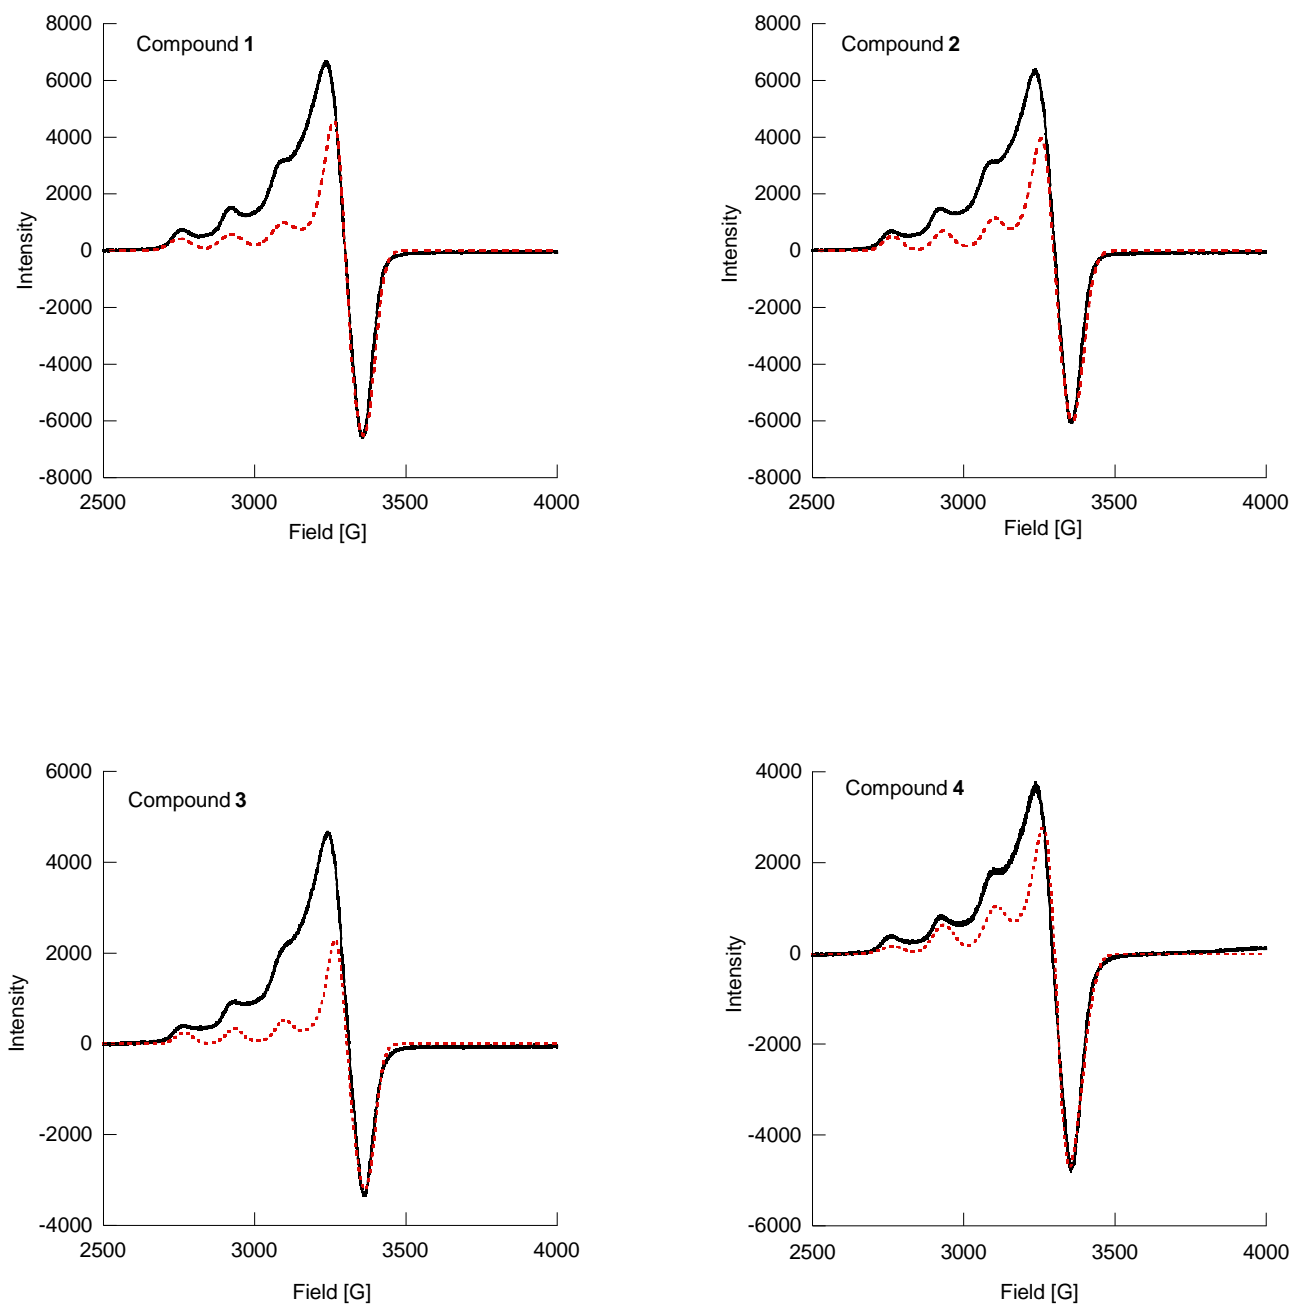

**Fig. S3.** X-band EPR spectra of compounds 1–4 in DMF solution (40 K).

Experimental (black line); simulated (dashed– red line).

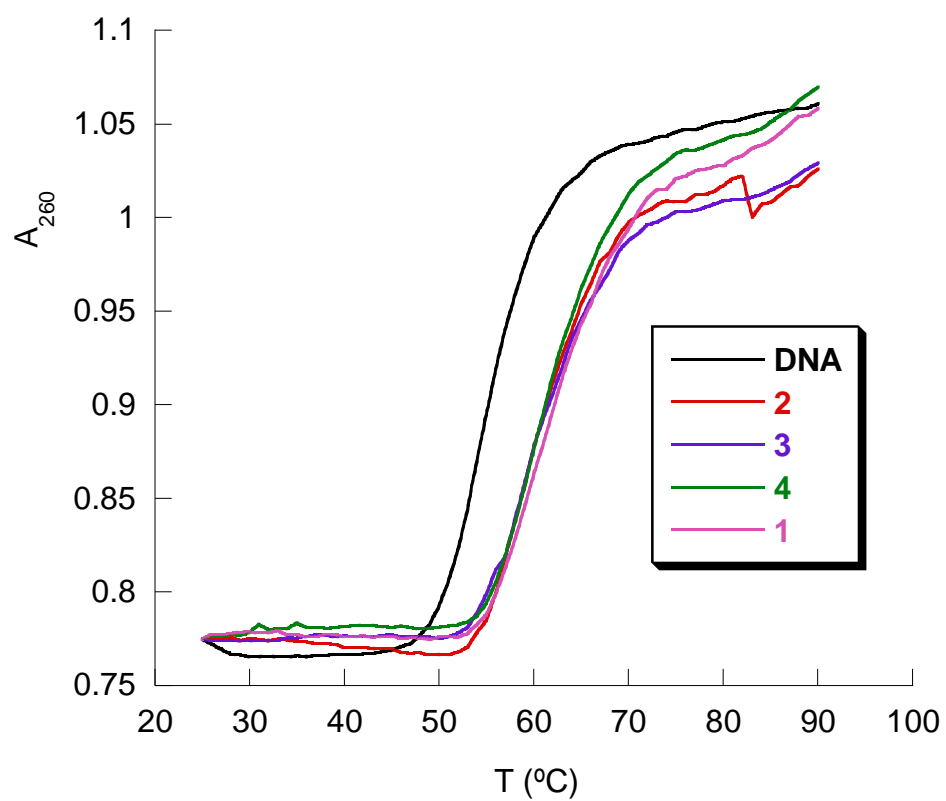

**Fig S4.** Thermal denaturation of CT-DNA in the absence and in the presence of the complexes **1**, **2**, **3** or **4**.

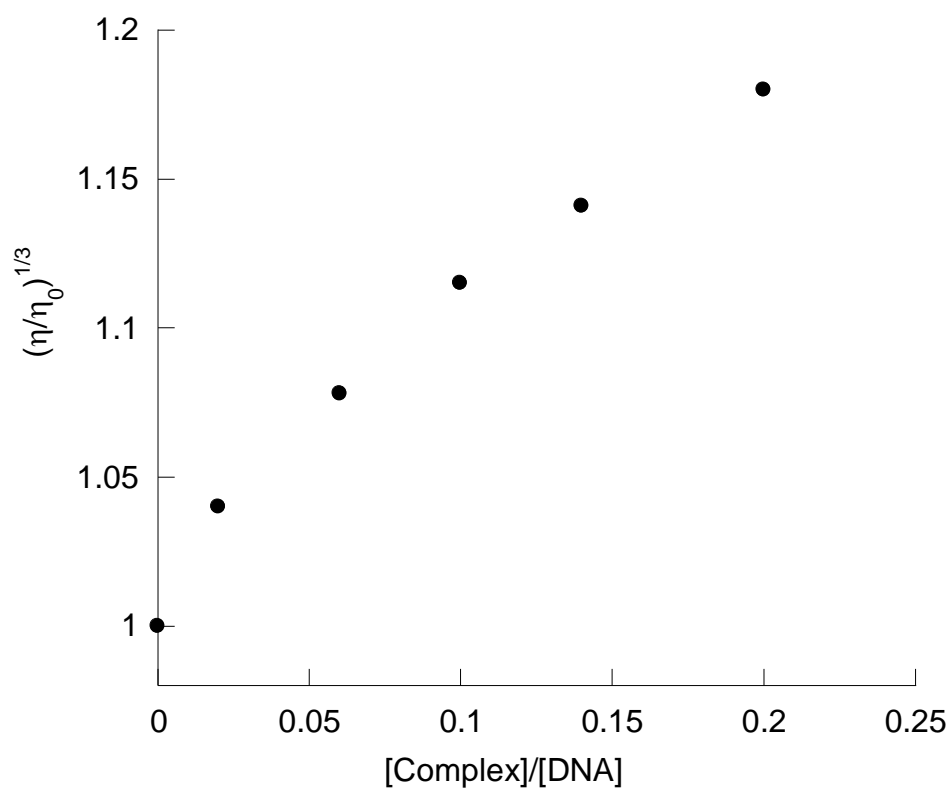

**Fig. S5.** Effect of  $[\text{Cu}(\text{L}2)_2(\text{bipy})]$  (**2**) on the relative viscosity of CT-DNA (50  $\mu\text{M}$  base pairs) in cacodylate buffer 0.1 M (pH = 6.0).

a)

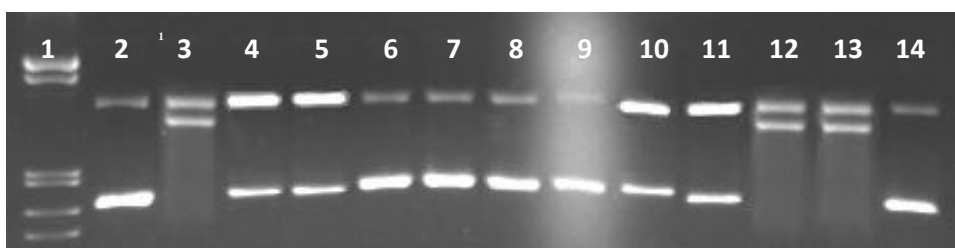

b)

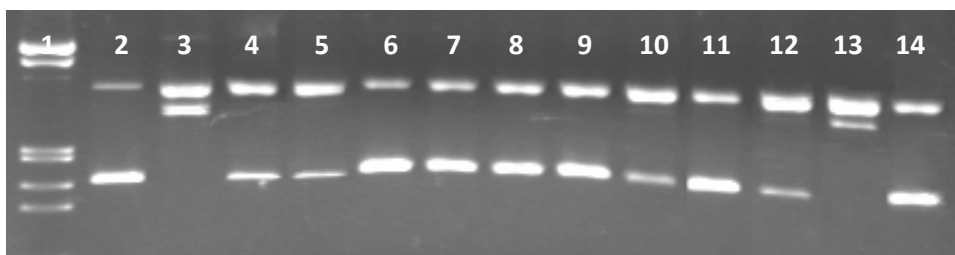

c)

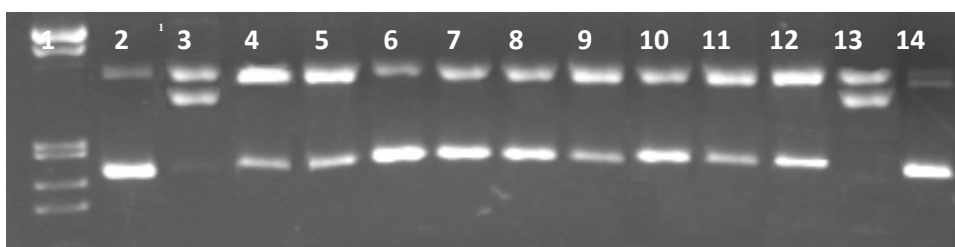

d)

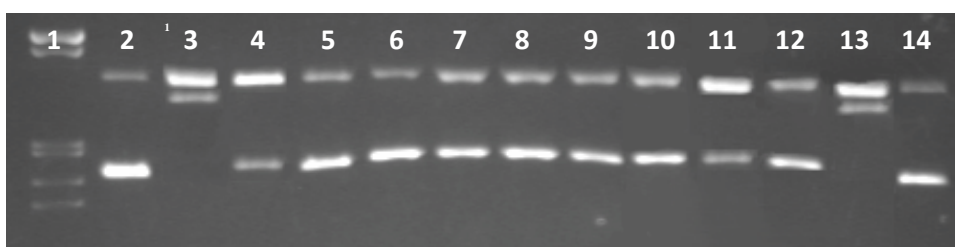

**Fig. S6.** Agarose gel electrophoresis of pUC18 plasmid treated with **1**, **2**, **3** or **4** and ascorbate in the presence of potential inhibitors. Incubation time 60 min (37 °C). Complex 24 μM, ascorbate (25 ×). a) complex **1**, b) complex **2**, c) complex **3** d) complex **4**: 1. λDNA/EcoRI+HindIII Marker; 2: pUC18 control + ascorbate, 3: complex without inhibitors, 4: dmsso 0.4 M, 5: *tert*-butyl alcohol 0.4 M, 6: sodium formate 0.4 M, 7: KI 0.4 M, 8: sodium azide 100 mM, 9: 2,2,6,6-tetramethyl-4-piperidone 100 mM, 10: Tiron 10 mM, 11: neocuproine 75 μM, 12: distamycin 8 μM, 13: methyl green (2.5 μL of a 0.01 mg/mL solution), 14: Catalase 10 μg/mL (6.50 units).

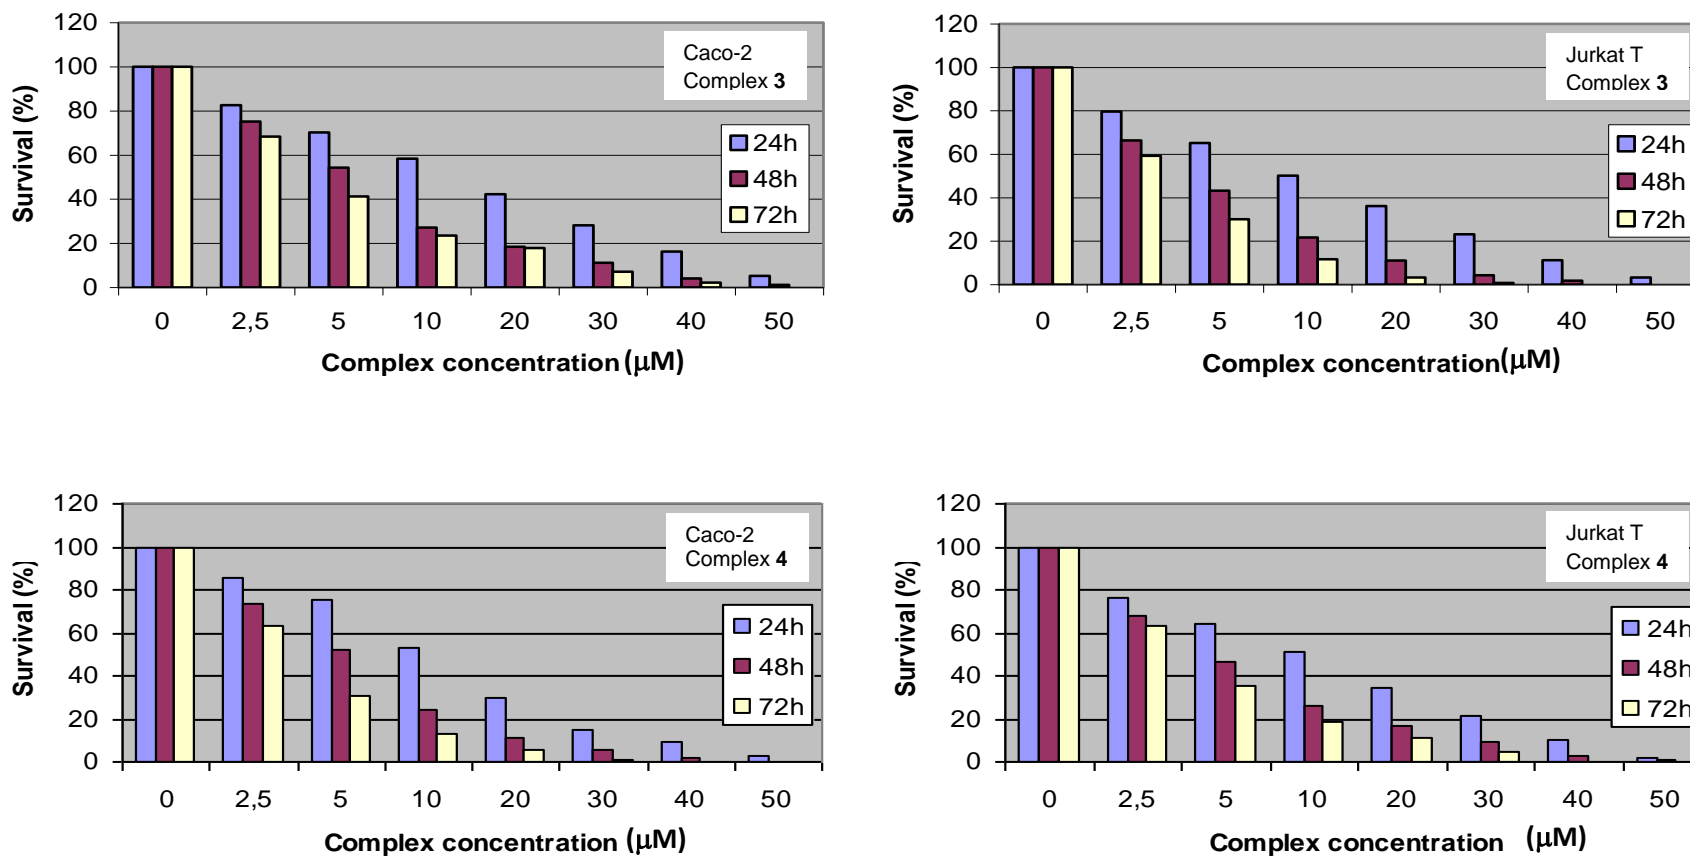

**Fig. S7.** Percentage of survival of Caco-2 cells or Jurkat T lymphocytes after treatment with complexes 3 or 4 for 24 h, 48 h or 72 h. Data represent the means of experiments performed in triplicate.



**Table S1.** EPR parameters for the compounds **1-4** and Cu(II)-bipy (1:1) calculated through simulation (ref. 63)

| <b>Compound</b>   | <b><math>g_{\parallel}</math></b> | <b><math>g_{\perp}</math></b> | <b><math>A_{\parallel} (\text{cm}^{-1})</math></b> | <b><math>g_{\parallel}/A_{\parallel}(\text{cm})</math></b> |
|-------------------|-----------------------------------|-------------------------------|----------------------------------------------------|------------------------------------------------------------|
| <b>1</b>          | 2.251                             | 2.050                         | $167 \times 10^{-4}$                               | 135                                                        |
| <b>2</b>          | 2.244                             | 2.051                         | $167 \times 10^{-4}$                               | 134                                                        |
| <b>3</b>          | 2.241                             | 2.047                         | $166 \times 10^{-4}$                               | 135                                                        |
| <b>4</b>          | 2.252                             | 2.041                         | $170 \times 10^{-4}$                               | 132                                                        |
| Cu(II)-bipy (1:1) | 2.250                             | 2.055                         | $144 \times 10^{-4}$                               | 156                                                        |

**Table S2.** IC<sub>50</sub> values of the complexes **1-4** against Caco-2 cells or Jurkat T lymphocytes (results obtained by the trypan blue exclusion method)

| Cells                | Complex  | IC <sub>50</sub> (μM) |            |           |
|----------------------|----------|-----------------------|------------|-----------|
|                      |          | 24 h                  | 48 h       | 72 h      |
| Caco-2 cells         | <b>1</b> | 15.66±0.29            | 7.16±0.32  | 4.85±0.13 |
|                      | <b>2</b> | 8.89 ± 0.65           | 4.57±0.40  | 2.89±0.13 |
|                      | <b>3</b> | 11.95±1.67            | 5.97± 0.62 | 3.78±0.69 |
|                      | <b>4</b> | 12.64±1.15            | 5.22±0.22  | 3.81±0.28 |
| Jurkat T lymphocytes | <b>1</b> | 11.46±0.12            | 6.60±0.57  | 4.39±0.19 |
|                      | <b>2</b> | 4.81±0.65             | 3.85±0.23  | 2.20±0.56 |
|                      | <b>3</b> | 10.09±1.37            | 4.34±0.26  | 3.78±0.20 |
|                      | <b>4</b> | 10.16±0.23            | 4.70±0.17  | 3.23±0.36 |

Data represent the means ± SD of experiments carried out in triplicate
